# Supplementary material for: Bayesian optimization for conformer generation
Source: PubMed Central journal article supplement (PMC6528340; doi:10.1186/s13321-019-0354-7), 2019-05-21
Supplement: 13321_2019_354_MOESM1_ESM.pdf [file 13321_2019_354_MOESM1_ESM.pdf]

|    | Rotatable bond SMARTS pattern                    | Parameter |
|----|--------------------------------------------------|-----------|
| 0  | [O:1]=[C:2]!@;-[O:3]~[CH0:4]                     | 1         |
| 1  | [O:1]=[C:2]([N])!@;-[O:3]~[C:4]                  | 1         |
| 2  | [O:1]=[C:2]!@;-[O:3]~[C:4]                       | 1         |
| 3  | [O:1]=[C:2]!@;-[O:3]~[!#1:4]                     | 1         |
| 4  | [\$(C=O):1][O:2]!@;-[c:3]~[*:4]                  | 2         |
| 5  | [\$(C=O):1][O:2]!@;-[CX3:3]~[*:4]                | 1         |
| 6  | [\$(C=O):1][O:2]!@;-[CH1:3][H:4]                 | 1         |
| 7  | [\$(C=O):1][O:2]!@;-[CH2:3]~[C:4]                | 1         |
| 8  | [H:1][CX4H1:2]!@;-[O:3][CX4:4]                   | 1         |
| 9  | [C:1][CH2:2]!@;-[O:3][CX4:4]                     | 1         |
| 10 | [*:1][CX4:2]!@;-[O:3][\$([CX3](=[!O])):4]        | 1         |
| 11 | [O:1][CX4:2]!@;-[O:3][CX4:4]                     | 1         |
| 12 | [*:1][CX4:2]!@;-[O:3][CX4:4]                     | 1         |
| 13 | [cH1:1][c:2]([cH1])!@;-[O:3][S:4]                | 2         |
| 14 | [cH1:1][c:2]([cH0])!@;-[O:3][S:4]                | 2         |
| 15 | [cH0:1][c:2]([cH0])!@;-[O:3][S:4]                | 2         |
| 16 | [cH1:1][c:2]([cH1])!@;-[O:3][c:4]                | 1         |
| 17 | [cH1:1][c:2]([cH0])!@;-[O:3][c:4]                | 1         |
| 18 | [cH0:1][c:2]([cH0])!@;-[O:3][c:4]                | 2         |
| 19 | [cH0:1][c:2]([cH0])!@;-[O:3][P:4]                | 2         |
| 20 | [cH0:1][c:2]([cH0])!@;-[O:3][p:4]                | 2         |
| 21 | [cH:1][c:2]([cH])!@;-[O:3][\$(C([F])([F])[F]):4] | 2         |
| 22 | [cH0:1][c:2]([cH0])!@;-[O:3][CX4H0:4]            | 2         |
| 23 | [a:1][c:2]([a])!@;-[O:3][CX4H0:4]                | 1         |
| 24 | [cH1,n:1][c:2]!@;-[O:3][CRH1:4]                  | 2         |
| 25 | [cH1,n:1][c:2]!@;-[O:3][CH1:4]                   | 2         |
| 26 | [nX2H0:1][c:2]([cH0])!@;-[O:3][CX4H0:4]          | 1         |
| 27 | [cH0:1][c:2]([nX2])!@;-[O:3][C:4]                | 1         |
| 28 | [nX2:1][c:2]([nX2])!@;-[O:3][C:4]                | 2         |
| 29 | [nX2:1][c:2]([nX3])!@;-[O:3][C:4]                | 1         |
| 30 | [cH1:1][c:2]([nX3])!@;-[O:3][C:4]                | 1         |
| 31 | [cH1:1][c:2]([nX2])!@;-[O:3][C:4]                | 1         |
| 32 | [\$([cH0]([CX3])):1][c:2]([cH1])!@;-[O:3][C:4]   | 1         |
| 33 | [cH1:1][c:2](cO)!@;-[O:3][C:4]                   | 1         |
| 34 | [\$(cO):1][c:2](cO)!@;-[O:3][C:4]                | 2         |
| 35 | [cH0:1][c:2]([cH0])!@;-[O:3][C:4]                | 2         |
| 36 | [cH0:1][c:2]([cH1])!@;-[O:3][C:4]                | 1         |
| 37 | [cH1:1][c:2]([cH1])!@;-[O:3][C:4]                | 2         |
| 38 | [a:1][c:2]!@;-[O:3][CX3H0:4]                     | 2         |
| 39 | [aH0:1][c:2]!@;-[OX2:3][!#1:4]                   | 2         |
| 40 | [!#1:1][CX4H0:2]!@;-[OX2:3][!#1:4]               | 1         |
| 41 | [H:1][CX4H1:2]!@;-[OX2:3][!#1:4]                 | 1         |

Continued on next page

|    | Rotatable bond SMARTS pattern                       | Parameter |
|----|-----------------------------------------------------|-----------|
| 42 | [C:1][CX4H2:2]!@;-[OX2:3][c:4]                      | 1         |
| 43 | [c:1][CX4H2:2]!@;-[OX2:3][C:4]                      | 1         |
| 44 | [C:1][CX4H2:2]!@;-[OX2:3][C:4]                      | 1         |
| 45 | [c:1][CX4H2:2]!@;-[OX2:3][c:4]                      | 1         |
| 46 | [!#1:1][CX4H2:2]!@;-[OX2:3][c:4]                    | 1         |
| 47 | [!#1:1][CX4H2:2]!@;-[OX2:3][C:4]                    | 1         |
| 48 | [c:1][CX4H2:2]!@;-[OX2:3][!#1:4]                    | 1         |
| 49 | [C:1][CX4H2:2]!@;-[OX2:3][!#1:4]                    | 1         |
| 50 | [!#1:1][CX4H2:2]!@;-[OX2:3][!#1:4]                  | 1         |
| 51 | [!#1:1][CX4:2]!@;-[OX2:3][!#1:4]                    | 2         |
| 52 | [\$([CX3]=O):1][NX3H0:2](C)!@;-[CX4H2:3][C:4]       | 2         |
| 53 | [\$([CX3]=O):1][NX3H1:2]!@;-[CX4H2:3][C:4]          | 1         |
| 54 | [\$(S(=O)(=O)):1][NX3H0:2]!@;-[CX4H2:3][!#1:4]      | 2         |
| 55 | [\$(S(=O)(=O)):1][NX3H1:2]!@;-[CX4H2:3][!#1:4]      | 1         |
| 56 | [\$(S(=O)(=O)):1][NX3H0:2]!@;-[CX4H1:3][H:4]        | 2         |
| 57 | [\$(S(=O)(=O)):1][NX3H1:2]!@;-[CX4H1:3][H:4]        | 1         |
| 58 | [\$(S(=O)(=O)):1][NH1:2]!@;-[c:3][nX2:4]            | 2         |
| 59 | [\$(S(=O)(=O)):1][NH0:2]!@;-[c:3]([cH1])[cH1:4]     | 2         |
| 60 | [\$(S(=O)(=O)):1][NH1:2]!@;-[c:3]([cH1])[cH1:4]     | 1         |
| 61 | [\$(S(=O)(=O)):1][NH0:2]!@;-[c:3]([cH1])[cH0:4]     | 2         |
| 62 | [\$(S(=O)(=O)):1][NH1:2]!@;-[c:3]([cH1])[cH0:4]     | 1         |
| 63 | [\$(S(=O)(=O)):1][NH0:2]!@;-[c:3]([cH0])[cH0:4]     | 2         |
| 64 | [\$(S(=O)(=O)):1][NH1:2]!@;-[c:3]([cH0])[cH0:4]     | 2         |
| 65 | [\$(S(=O)(=O)):1][N:2]!@;-[c:3][a:4]                | 1         |
| 66 | [O-:1][N+:2](=O)!@;-[c:3]([cH,nX2H0])[cH,nX2H0:4]   | 2         |
| 67 | [O-:1][N+:2](=O)!@;-[c:3]([cH0])[cH,nX2H0:4]        | 2         |
| 68 | [O-:1][N+:2](=O)!@;-[c:3]([cH0])[cH0:4]             | 2         |
| 69 | [O-:1][N+:2](=O)!@;-[c:3][a:4]                      | 2         |
| 70 | [cH0:1][c:2]([cH0])!@;-[NX3H1:3][C,c:4](~[N,n]...   | 2         |
| 71 | [cH0:1][c:2]([cH1])!@;-[NX3H1:3][C,c:4](~[N,n]...   | 1         |
| 72 | [cH0:1][c:2]([nX2H0])!@;-[NX3H1:3][C,c:4](~[N,n]... | 2         |
| 73 | [cH1:1][c:2]([cH1])!@;-[NX3H1:3][C,c:4](~[N,n]...   | 2         |
| 74 | [nX2H0:1][c:2]([nX2H0])!@;-[NX3H1:3][C,c:4](~[...]  | 2         |
| 75 | [nX2H0:1][c:2]([nX3H1])!@;-[NX3H1:3][C,c:4](~[...]  | 2         |
| 76 | [a:1][a:2]!@;-[NH1:3][C,c:4](~[N,n])(~[N,n])        | 2         |
| 77 | [C:1][NH:2]!@;-[C:3](=[NH2:4])[NH2]                 | 2         |
| 78 | [NH2][C:1](=[NH2])[NH:2]!@;-[CH2:3][C:4]            | 1         |
| 79 | [a:1][c:2]!@;-[NX2:3]=[\$(C([NX3])n):4]             | 2         |
| 80 | [nX2:1][c:2]!@;-[NX2:3]=[\$(C([NX3])N):4]           | 2         |
| 81 | [cH0:1][c:2]!@;-[NX2:3]=[\$(C([NX3])N):4]           | 2         |
| 82 | [cH1:1][c:2]!@;-[NX2:3]=[\$(C([NX3])N):4]           | 2         |
| 83 | [O:1]=[C:2]([NH1])!@;-[NX3H1:3](C=O)[H:4]           | 1         |

Continued on next page

|     | Rotatable bond SMARTS pattern                     | Parameter |
|-----|---------------------------------------------------|-----------|
| 84  | [O:1]=[C:2]!@;-[NX3H1:3](C=O)[H:4]                | 2         |
| 85  | [O:1]=[C:2]!@;-[NX3:3](C=O)*:4                    | 2         |
| 86  | [(C=O):1][NX3H1:2]!@;-[CX3:3]=[NX2:4]             | 2         |
| 87  | [(C=O):1][NX3H0:2]!@;-[CX3:3]=[*H0:4]             | 2         |
| 88  | [(C=O):1][NX3H0:2]!@;-[CX3:3]=[*H1:4]             | 1         |
| 89  | [(C=O):1][NX3H1:2]!@;-[CX3:3]=[*H2:4]             | 2         |
| 90  | [(C=O):1][NX3H1:2]!@;-[CX3:3]=[*H1:4]             | 1         |
| 91  | [(C=O):1][NX3H1:2]!@;-[CX3:3]=[*H0:4]             | 2         |
| 92  | [(C=O):1][NX3H0:2]!@;-[CX3H1:3]=[*:4]             | 1         |
| 93  | [(C=O):1][NX3H1:2]!@;-[CX3H1:3]=[*:4]             | 1         |
| 94  | [(C)(=O):1][NX3H0:2]!@;-[CX4H2:3]\$(c)([cH...     | 2         |
| 95  | [(C=O):1][NX3H1:2]!@;-[CX4H2:3]\$(c)([cH,nX2...   | 2         |
| 96  | [(C=O):1][NX3H0:2]!@;-[CX4H2:3]!#1:4              | 2         |
| 97  | [(C=O):1][NX3H1:2]!@;-[CX4H2:3]!#1:4              | 1         |
| 98  | [(C=O):1][NX3H0:2]!@;-[CX4H1:3][H:4]              | 2         |
| 99  | [(C=O):1][NX3H1:2]!@;-[CX4H1:3][H:4]              | 1         |
| 100 | [(C=O):1][NX3H0:2]!@;-[CX4H0:3][C:4]              | 1         |
| 101 | [(C=O):1][NX3H1:2]!@;-[CX4H0:3][C:4]              | 1         |
| 102 | [(C=O):1][NX3:2]!@;-!#1:3!#1:4                    | 1         |
| 103 | \$(C)(=O)(\$([NX3H1]),\$([NX3H2]))[NX3H1]:1...    | 1         |
| 104 | \$(C)(=O)(\$([NX3H1]),\$([NX3H2]))[NX3H1]:1...    | 1         |
| 105 | \$(C)(=O):1[NX3H1:2]!@;-\$(a)([nH0,o]):3...       | 1         |
| 106 | \$(C)(=O)(\$([NX3H1]),\$([NX3H2]))[NX3H1]:1...    | 2         |
| 107 | \$(C)(=O):1[NX3H1:2]!@;-[c:3]([cH])[nX2H0:4]      | 1         |
| 108 | [(C=O):1][NX3H0:2]!@;-[c:3]([s,o])[n:4]           | 1         |
| 109 | [(C=O):1][NX3H1:2]!@;-[c:3]([s,o])[n:4]           | 1         |
| 110 | \$(C)(=O):1[NX3:2]!@;-[a:3](s)[a:4]               | 1         |
| 111 | [(C=O):1][NX3:2]!@;-[a:3][nH:4]                   | 1         |
| 112 | [(C=O):1][NX3H1:2]!@;-[c:3]([cH0]Cl)[cH:4]        | 1         |
| 113 | [(C=O):1][NX3H1:2]!@;-[c:3]([cH0]F)[cH:4]         | 1         |
| 114 | [(C=O):1][NX3:2]!@;-\$(a)([cH1]):3\$([aH0]...     | 1         |
| 115 | [(C=O):1][NX3:2]!@;-[a:3][aH0:4]                  | 1         |
| 116 | [(C=O):1][NX3H1:2]!@;-[c:3]([cH1])[cH1:4]         | 2         |
| 117 | [(C=O):1][NX3H0:2]!@;-[c:3]([cH1])[cH1:4]         | 2         |
| 118 | [(C=O):1][NX3H0:2]!@;-[c:3]([cH0])[cH:4]          | 2         |
| 119 | [(C=O):1][NX3H1:2]!@;-[c:3]([cH0])[cH:4]          | 1         |
| 120 | [(C=O):1][NX3H0:2]!@;-[c:3]([cH0])[cH0:4]         | 2         |
| 121 | [(C=O):1][NX3H1:2]!@;-[c:3]([cH0])[cH0:4]         | 2         |
| 122 | [O,S:1]=[C:2](\$([NX3H1]),\$([NX3H2]))!@;-\$([... | 2         |
| 123 | [O:1]=[C:2]!@;-\$([NX3](c([nH1])n)):3[H:4]        | 1         |
| 124 | [O:1]=[C:2](c)!@;-\$([NX3](c([nX2H0])([nX2H0])... | 2         |
| 125 | [O:1]=[CX3:2](\$([NX3H1]C))!@;-[NX3H1:3]!#1:4     | 1         |

Continued on next page

|     | Rotatable bond SMARTS pattern                    | Parameter |
|-----|--------------------------------------------------|-----------|
| 126 | [O:1]=[C:2](!\$(NH1))!@;-[NX3H1:3]([H:4])\$...   | 1         |
| 127 | [O,S:1]=[C:2](\$([NX3H1]),\$(NX3H2))!@;-[O:1]    | 2         |
| 128 | [O:1]=[C:2]!@;-[NX3H0:3]([a:4])[A]               | 2         |
| 129 | [O:1]=[CX3:2](a)!@;-[NX3H0:3](!#1:4)             | 2         |
| 130 | [O:1]=[CX3:2]!@;-[NX3H0:3](!#1:4)                | 2         |
| 131 | [O:1]=[CX3:2]!@;-[NX3H1:3](!#1:4)                | 1         |
| 132 | [CH0:1][NX3:2]([CH0])!@;-[c:3][a:4]              | 2         |
| 133 | [CH0:1][NX3:2]([CH1])!@;-[c:3][a:4]              | 2         |
| 134 | [cH1,nX2H0:1][c:2]([cH1,nX2H0])!@;-[NX3&r:3]*:4  | 2         |
| 135 | [a:1][c:2]!@;-[NX3H1:3]\$(CX4&r)([C;r])([C;r]... | 2         |
| 136 | [cH1:1][c:2]([cH1])!@;-[NX3:3][CX4:4]            | 2         |
| 137 | [cH0:1][c:2]([cH,nX2H0])!@;-[NX3H1:3][CX4:4]     | 1         |
| 138 | [cH0:1][c:2]([cH,nX2H0])!@;-[NX3H0:3][CX4:4]     | 1         |
| 139 | [cH0:1][c:2]([cH0])!@;-[NX3:3][CX4:4]            | 1         |
| 140 | [c:1][c:2](c)!@;-[NX3:3][CX4:4]                  | 1         |
| 141 | [cH1:1][c:2]([cH1])!@;-[NX3:3][a:4]              | 2         |
| 142 | [cH1:1][c:2]([cH0])!@;-[NX3:3][a:4]              | 1         |
| 143 | [cH0:1][c:2]([cH0])!@;-[NX3:3][a:4]              | 2         |
| 144 | [cH0:1][a:2]!@;-[NX3H0:3]\$(CX3=O):4             | 2         |
| 145 | [cH0:1][a:2]!@;-[NX3H1:3]\$(CX3=O):4             | 1         |
| 146 | [nX2H0:1][a:2]([nX2H0])!@;-[NX3H0:3]\$(CX3=O...  | 1         |
| 147 | [nX2H0:1]\$(a(!nX2H0)(nX2H0))!@;-[NX3H1]:2...    | 1         |
| 148 | [nX2H0:1][a:2]!@;-[NX3H1:3]\$(CX3=O):4           | 2         |
| 149 | [a:1][a:2]!@;-[NX3H1:3]\$(CX3=O):4               | 2         |
| 150 | [a:1][a:2]!@;-[NX3:3][CX4H0:4]                   | 1         |
| 151 | [a:1][a:2]!@;-[NX3:3](!#1:4)                     | 2         |
| 152 | [O:1]=[CX3:2]!@;-[NX3:3]([aH0:4])(aH0)           | 2         |
| 153 | [O:1]=[CX3:2]!@;-[NX3:3][aH1:4]                  | 2         |
| 154 | [a:1][CX3:2](=S)!@;-[NX3:3][a:4]                 | 1         |
| 155 | (!#1:1)[CX3:2](=S)!@;-[NX3H0:3](!#1:4)           | 2         |
| 156 | (!#1:1)[CX3:2](=S)!@;-[NX3H1:3](!#1:4)           | 2         |
| 157 | (!#1:1)[CH2:2]!@;-[n:3][cH0:4]                   | 2         |
| 158 | (!#1:1)[CH2:2]!@;-[n:3][a:4]                     | 2         |
| 159 | [cH0:1][n:2]!@;-[CX3H0:3]~\$([n,N](-a)):4        | 1         |
| 160 | [CX4:1][CX4H2:2]!@;-[NX3:3][CX4:4]               | 1         |
| 161 | [C:1][CX4H2:2]!@;-[NX3:3][C:4]                   | 1         |
| 162 | [C:1][CX4:2]!@;-[NX3:3][C:4]                     | 1         |
| 163 | (!#1:1)[CX4H2:2]!@;-[NX3H1:3](!#1:4)             | 1         |
| 164 | (!#1:1)[CX4H2:2]!@;-[NX3:3](!#1:4)               | 1         |
| 165 | (!#1:1)[CX4H1:2]!@;-[NX3:3](!#1:4)               | 1         |
| 166 | (!#1:1)[CX4:2]!@;-[NX3:3](!#1:4)                 | 1         |
| 167 | (!#1:1)\$(S(=O)=O):2!@;-[NX3:3]([aH1])[aH1:4]    | 2         |

Continued on next page

|     | Rotatable bond SMARTS pattern                      | Parameter |
|-----|----------------------------------------------------|-----------|
| 168 | [!#1:1][\$(S(=O)=O):2]!@;-[nX3:3][aH0:4]           | 2         |
| 169 | [c:1][S:2](=O)(=O)!@;-[NX2H0-:3]-[*:4]             | 2         |
| 170 | [*:1][\$(S(=O)=O):2]!@;-[NX3H0&r:3][*:4]           | 2         |
| 171 | [C:1][\$(S(=O)=O):2]!@;-[NX3H1:3][c:4]             | 2         |
| 172 | [C:1][\$(S(=O)=O):2]!@;-[NX3H0:3][c:4]             | 2         |
| 173 | [c:1][\$(S(=O)=O):2]!@;-[NX3H1:3][C:4]             | 2         |
| 174 | [c:1][\$(S(=O)=O):2]!@;-[NX3H0:3][C:4]             | 2         |
| 175 | [c:1][\$(S(=O)=O):2]!@;-[NX3H1:3][c:4]             | 2         |
| 176 | [c:1][\$(S(=O)=O):2]!@;-[NX3H0:3][c:4]             | 2         |
| 177 | [C:1][\$(S(=O)=O):2]!@;-[NX3H1:3][C:4]             | 2         |
| 178 | [C:1][\$(S(=O)=O):2]!@;-[NX3H0:3][C:4]             | 2         |
| 179 | [*:1][\$(S(=O)=O):2]!@;-[NX3H1:3][*:4]             | 2         |
| 180 | [*:1][\$(S(=O)=O):2]!@;-[NX3H0:3][*:4]             | 2         |
| 181 | [!#1:1][CX3:2]!@;-[SX2:3][!#1:4]                   | 2         |
| 182 | [!#1:1][CX4:2]!@;-[SX2:3][!#1:4]                   | 2         |
| 183 | [!#1:1][CX3:2]!@;-[SX3:3][!#1:4]                   | 2         |
| 184 | [!#1:1][CX4:2]!@;-[SX3:3][!#1:4]                   | 1         |
| 185 | [!#1:1][CX3:2]!@;-[SX4:3][!#1:4]                   | 2         |
| 186 | [H:1][CX4H1:2]!@;-[SX4:3][!#1:4]                   | 1         |
| 187 | [!#1:1][CX4:2]!@;-[SX4:3][!#1:4]                   | 1         |
| 188 | [aH1:1][c:2]([aH1])!@;-[SX2:3][!#1:4]              | 1         |
| 189 | [aH1:1][c:2]([aH0])!@;-[SX2:3][*R:4]               | 1         |
| 190 | [aH1:1][c:2]([aH0])!@;-[SX2:3][!#1:4]              | 1         |
| 191 | [aH0:1][c:2]([aH0])!@;-[SX2:3][!#1:4]              | 1         |
| 192 | [!#1:1][c:2]!@;-[SX2:3][!#1:4]                     | 2         |
| 193 | [!#1:1][c:2]!@;-[SX3:3][!#1:4]                     | 2         |
| 194 | [aH1:1][c:2]([aH1])!@;-[SX4:3][!#1:4]              | 2         |
| 195 | [aH0:1][c:2]([aH1])!@;-[SX4:3][!#1:4]              | 1         |
| 196 | [aH0:1][c:2]([aH0])!@;-[SX4:3][!#1:4]              | 2         |
| 197 | [O:1]=[CX3:2]([NH1])!@;-[CH2:3][CX3:4]=O           | 1         |
| 198 | [O:1]=[CX3:2]([NH1])!@;-[CH2:3][C:4]               | 1         |
| 199 | [\$([CX3]([C])([H])):1]=[CX3:2]([C])!@;-[CH2:3]... | 1         |
| 200 | [\$([CX3]([C])([H])):1]=[CX3:2]([H])!@;-[CH1:3]... | 1         |
| 201 | [\$([CX3]([C])([H])):1]=[CX3:2]([H])!@;-[CH2:3]... | 1         |
| 202 | [N:1][C:2](=O)!@;-[CX4H2:3][CX4H2:4]               | 1         |
| 203 | N[C:2](=[O:1])!@;-[CH2:3][N:4]                     | 2         |
| 204 | [O:1]=[C:2]([O-])!@;-[CX4H1:3][H:4]                | 1         |
| 205 | [CX3H2:1]=[CX3:2]!@;-[CX3:3]=[C:4]                 | 1         |
| 206 | [CX3:1]=[CX3:2]!@;-[CH2:3][OX2:4]                  | 1         |
| 207 | [CX3:1]=[CX3:2]!@;-[CH1:3](C)[C:4]                 | 1         |
| 208 | [CX3:1]=[CX3:2]!@;-[CH2:3][C:4]                    | 1         |
| 209 | [CX3:1]=[CX3:2]!@;-[CH2:3][c:4]                    | 1         |

Continued on next page

|     | Rotatable bond SMARTS pattern                     | Parameter |
|-----|---------------------------------------------------|-----------|
| 210 | [CX3:1]=[CX3:2]!@;-[CH2:3][!#1:4]                 | 1         |
| 211 | [O:1]=[CX3:2](O)!@;-[CX3:3](\$([NH1,NH2,CH2]))... | 2         |
| 212 | [O:1]=[CX3:2]!@;-[CX3:3]=[O:4]                    | 1         |
| 213 | [CX3R:1]=[CX3R:2]!@;-[CX3:3]=[CX3:4]              | 2         |
| 214 | [CX3H0:1]=[CX3H0:2]!@;-[CX3:3]=[CX3H0:4]          | 1         |
| 215 | [CX3H0:1]=[CX3H0:2]!@;-[CX3H0:3]=[CX3:4]          | 2         |
| 216 | [CX3H0:1]=[CX3:2]!@;-[CX3H0:3]=[CX3:4]            | 1         |
| 217 | [CX3H0:1]=[CX3H0:2]!@;-[CX3:3]=[CX3:4]            | 1         |
| 218 | [CX3:1]=[CX3:2]!@;-[CX3:3]=[CX3:4]                | 1         |
| 219 | [*^2:1]~[C^2:2](!H)!@;-[C^2:3]~[*^2:4]            | 2         |
| 220 | [*^2:1]~[C^2:2]!@;-[C^2:3]~[*^2:4]                | 2         |
| 221 | [O:1]=[CX3:2]!@;-[CX4&r3:3]!@![#1:4]              | 2         |
| 222 | [O:1]=[CX3:2]!@;-[CX4H1&r3:3][H:4]                | 2         |
| 223 | [OX2:1][CX4H2:2]!@;-[CX4H2:3][N&r:4]              | 1         |
| 224 | [OX2:1][CX4H2:2]!@;-[CX4H2:3][N:4]                | 1         |
| 225 | [OX2:1][CX4:2]!@;-[CX4:3][N:4]                    | 1         |
| 226 | [OX2:1][CX4H2:2]!@;-[CX4H2:3][OX2:4]              | 1         |
| 227 | [OX2:1][CX4:2]!@;-[CX4:3][OX2:4]                  | 1         |
| 228 | [!#1:1][CX4&r:2]!@;-[CX4&r:3][!#1:4]              | 1         |
| 229 | [!#1:1][CX4H2:2]!@;-[CX4H2:3][!#1:4]              | 1         |
| 230 | [!#1:1][CX4:2]!@;-[CX4:3][!#1:4]                  | 1         |
| 231 | [OX2:1][CX4H2:2]!@;-[CX3:3](\$([NX3H1,NX3H2]))... | 2         |
| 232 | [OH1:1][CX4:2]!@;-[CX3:3]=[O:4]                   | 2         |
| 233 | [NH1:1][CX4:2]!@;-[CX3:3]=[O:4]                   | 2         |
| 234 | [O:1][CX4:2]!@;-[CX3:3]=[O:4]                     | 2         |
| 235 | [N:1][CX4:2]!@;-[CX3:3]=[O:4]                     | 2         |
| 236 | [C:1][CX4H2:2]!@;-[CX3:3]=[O:4]                   | 1         |
| 237 | [c:1][CX4H2:2]!@;-[CX3:3]=[O:4]                   | 1         |
| 238 | [!#1:1][CX4H2:2]!@;-[CX3:3]=[O:4]                 | 2         |
| 239 | [c:1][CX4:2]!@;-[CX3:3]=[O:4]                     | 1         |
| 240 | [C:1][CX4:2]!@;-[CX3:3]=[O:4]                     | 1         |
| 241 | [!#1:1][CX4:2]!@;-[CX3:3]=[O:4]                   | 1         |
| 242 | [c:1][CX4:2]!@;-[CX3:3][C:4]                      | 1         |
| 243 | [C:1][CX4:2]!@;-[CX3:3][c:4]                      | 1         |
| 244 | [c:1][CX4:2]!@;-[CX3:3][c:4]                      | 2         |
| 245 | [C:1][CX4:2]!@;-[CX3:3][C:4]                      | 1         |
| 246 | [!#1:1][CX4:2]!@;-[CX3H0:3][!#1:4]                | 1         |
| 247 | [H:1][CX4H1:2]!@;-[CX3:3][!#1:4]                  | 2         |
| 248 | [!#1:1][CX4H2:2]!@;-[CX3:3][!#1:4]                | 1         |
| 249 | \$([cH0](\$([NX3H2]),\$([NX3H1]))):1][a:2]!@;-... | 2         |
| 250 | [nH0:1][c&r6:2]([nH0])!@;-[c&r6:3]([nH0])[nH0:4]  | 2         |
| 251 | [nH0&r6:1][c&r6:2]([nH0&r6])!@;-[c&r6:3]([cH1&... | 2         |

Continued on next page

|     | Rotatable bond SMARTS pattern                     | Parameter |
|-----|---------------------------------------------------|-----------|
| 252 | [nH0&r6:1][c&r6:2]([nH0&r6])!@;-[c&r6:3]([cH1&... | 2         |
| 253 | [c:1][c:2]!@;-[c:3]\$(c!@c):4]                    | 2         |
| 254 | [cH0:1][c:2]([cH0])!@;-[c:3]([cH0:4])[cH0]        | 2         |
| 255 | [cH0:1][c:2]([cH0])!@;-[c:3]([cH0:4])[cH1]        | 2         |
| 256 | [cH0:1][c:2]([cH1])!@;-[c:3]([cH0:4])[cH1]        | 2         |
| 257 | [cH0:1][c:2]([cH0])!@;-[c:3]([cH1:4])[cH1]        | 2         |
| 258 | [cH0:1][c:2]([cH1])!@;-[c:3]([cH1:4])[cH1]        | 1         |
| 259 | [cH1:1][c:2]([cH1])!@;-[c:3]([cH1:4])[cH1]        | 2         |
| 260 | [nX2H0:1][c:2]!@;-[c:3][nX3H1:4]                  | 2         |
| 261 | [nX2H0:1][c:2](!nX2H0)!@;-[c:3](!nX2H0)[nX...     | 1         |
| 262 | [nX2H0:1]\$(c([nX2H0])(a(a)(a))!@;-c[nX2H0]):2... | 1         |
| 263 | [nX2H0:1]\$([c&r6](c[OH])):2!@;-[\$([c&r6](c[O... | 1         |
| 264 | [c:1][c:2]!@;-[c:3][s,o,nX3H1:4]                  | 1         |
| 265 | [cH0:1][c:2]([cH0])!@;-[c:3][nX2H0:4]             | 2         |
| 266 | [cH0:1][c:2]!@;-[c:3]([cH0])[nX2H0:4]             | 2         |
| 267 | [c:1][c:2]!@;-[c:3]([cH0])[nX2H0:4]               | 1         |
| 268 | [c:1][c:2]([cH0])!@;-[c:3][nX2H0:4]               | 2         |
| 269 | [cH1:1][c:2]!@;-[c:3]([cH1])[nX2H0:4]             | 2         |
| 270 | [c:1][c&r5:2]!@;-[c&r5:3][c:4]                    | 2         |
| 271 | [c:1][c&r6:2]!@;-[c&r6:3][c:4]                    | 1         |
| 272 | [c:1][c&r6:2]!@;-[c&r6:3][cH0:4]                  | 2         |
| 273 | [c:1][c&r6:2]!@;-[c&r6:3][c:4]                    | 1         |
| 274 | [c:1][c:2]!@;-[c:3][c:4]                          | 1         |
| 275 | [nX2&r6:1][cH0&r6:2]([cH1&r6])!@;-[CX4H2:3][O!... | 1         |
| 276 | [cH0:1][c:2]!@;-[CX4H0:3][a:4]                    | 1         |
| 277 | [cH0:1][c:2]!@;-[CX4H0:3][N,O,S:4]                | 1         |
| 278 | [cH0:1][c:2]!@;-[CX4H0:3][CX3:4]                  | 1         |
| 279 | [cH0:1][c:2]!@;-[CX4H0:3][CX4:4]                  | 1         |
| 280 | [cH0:1][c:2]!@;-[CX4H0:3][*:4]                    | 1         |
| 281 | [cH0:1][c:2]!@;-[CX4H2:3][a:4]                    | 2         |
| 282 | [cH0:1][c:2]!@;-[CX4H2:3][CX3:4]                  | 2         |
| 283 | [cH1:1][c:2]([cH1])!@;-[CX4H2:3]\$(CX4H1)C(=O...  | 2         |
| 284 | [cH1:1][c:2]([cH1])!@;-[CX4H2:3][CX4:4]           | 2         |
| 285 | [cH0:1][c:2]!@;-[CX4H2:3][CX4:4]                  | 2         |
| 286 | [cH0:1][c:2]!@;-[CX4H2:3][N,O,S:4]                | 2         |
| 287 | [cH0:1][c:2]!@;-[CX4H2:3][!#1:4]                  | 2         |
| 288 | [cH0:1][c:2]!@;-[CX4H1:3][a:4]                    | 2         |
| 289 | [cH0:1][c:2]!@;-[CX4H1:3][CX4:4]                  | 2         |
| 290 | [cH0:1][c:2]!@;-[CX4H1:3][CX3:4]                  | 1         |
| 291 | [cH0:1][c:2]!@;-[CX4H1:3][N,O,S:4]                | 1         |
| 292 | [cH0:1][c:2]!@;-[CX4H1:3][H:4]                    | 2         |
| 293 | [a:1][c:2]!@;-[CX4H0:3][a:4]                      | 2         |

Continued on next page

|     | Rotatable bond SMARTS pattern                      | Parameter |
|-----|----------------------------------------------------|-----------|
| 294 | [a:1][c:2]!@;-[CX4H0:3][CX3:4]                     | 1         |
| 295 | [a:1][c:2]!@;-[CX4H0:3][CX4:4]                     | 1         |
| 296 | [a:1][c:2]!@;-[CX4H0:3][N,O:4]                     | 2         |
| 297 | [a:1][c:2]!@;-[CX4H2:3][a:4]                       | 2         |
| 298 | [a:1][c:2]!@;-[CX4H2:3][CX3:4]                     | 2         |
| 299 | [n,o,s:1][c:2]!@;-[CX4H2:3][CX4:4]                 | 1         |
| 300 | [a:1][c:2]!@;-[CX4H2:3]!#1:4]                      | 2         |
| 301 | [a:1][c:2]!@;-[CX4H1:3][N,O:4]                     | 1         |
| 302 | [a:1][c:2]!@;-[CX4H1:3][a:4]                       | 2         |
| 303 | [a:1][c:2]!@;-[CX4H1:3][H:4]                       | 2         |
| 304 | [nX2H0:1][c:2]!@;-[C:3](=[N:4])(-[NH1,NH2])        | 2         |
| 305 | [a:1][c:2]!@;-[C:3](=[N][CX4]:4)([N][CX4...]       | 2         |
| 306 | [a:1][c:2]!@;-[C:3](=[NH0][CX4]:4)(-N)             | 2         |
| 307 | [a:1][c:2]!@;-[C:3](=[N]!#1:4)([N(C)[...]          | 2         |
| 308 | [a:1][c:2]!@;-[C:3](=[N]!#1:4)([N(C)~ ...]         | 2         |
| 309 | [a:1][c:2]!@;-[C:3](=[N:4])(-N)                    | 2         |
| 310 | [O:1]=[C:2]([O-])!@;-[c:3]\$(aC(=O)(O)):4]         | 2         |
| 311 | [O:1]=[C:2]([O-])!@;-[c:3][nX3H1:4]                | 2         |
| 312 | [O:1]=[C:2]([O-])!@;-[c:3][nX2H0:4]                | 2         |
| 313 | [O:1]=[C:2]([O-])!@;-[c:3]([cH0])[cH0:4]           | 1         |
| 314 | [O:1]=[C:2]([O-])!@;-[c:3]([cH1])\$([cH0][NH1,...] | 2         |
| 315 | [O:1]=[C:2]([O-])!@;-[c:3]([cH1])[cH0:4]           | 2         |
| 316 | [O:1]=[C:2]([O-])!@;-[c:3]([cH1])[cH1:4]           | 2         |
| 317 | [O:1]=[C:2]([O-])!@;-[c:3][a:4]                    | 2         |
| 318 | \$([c]([NH1,NH2])):1[c:2]!@;-[CX3:3](![O])=[O:4]   | 1         |
| 319 | \$(a[OH1]):1[a:2]!@;-[CX3:3]([NX3H0,CX4H0,c])...   | 1         |
| 320 | \$(a[NH1,NH2]):1[a:2]!@;-[CX3:3]([NX3H0,CX4H0...]  | 1         |
| 321 | [cH0:1][c:2]([cH1])!@;-[CX3:3](c)=[O:4]            | 1         |
| 322 | [cH1:1][c:2]([cH1])!@;-[CX3:3](c)=[O:4]            | 2         |
| 323 | [a:1][a:2]!@;-[CX3:3](a)=[O:4]                     | 1         |
| 324 | \$([cH0](=O)):1[c:2]([cH1])!@;-[CX3:3]([NX3H1...]  | 1         |
| 325 | [nH0&r6:1][c&r6:2]([cH1&r6])!@;-[C:3]([NH1,NH2...] | 1         |
| 326 | [s:1][c:2]!@;-[C:3]([NH1])=[O:4]                   | 2         |
| 327 | \$([cH0]Cl):1[c:2]([cH1])!@;-[CX3:3]([NX3H1])...   | 2         |
| 328 | \$([cH0]F):1[c:2]([cH1])!@;-[CX3:3]([NX3H1])=...   | 1         |
| 329 | \$([cH0][OH0]):1[c:2]([cH1])!@;-[C:3](=O)[NH1:4]   | 1         |
| 330 | \$([cH0][OH1]):1[c:2]([cH1])!@;-[C:3](=O)[NH1:4]   | 2         |
| 331 | [cH0:1][c:2]([cH1])!@;-[CX3:3]([NX3H1])=[O:4]      | 1         |
| 332 | [cH0:1][c:2]([cH1])!@;-[CX3:3]([NX3H0])=[O:4]      | 2         |
| 333 | [cH1:1][c:2]([cH1])!@;-[C:3]([NH1,NH2])=[O:4]      | 2         |
| 334 | [a:1][c:2]!@;-[C:3]([NH0])=[O:4]                   | 1         |
| 335 | [a:1][c:2]!@;-[C:3]([NH1,NH2])=[O:4]               | 2         |

Continued on next page



|     | Rotatable bond SMARTS pattern                      | Parameter |
|-----|----------------------------------------------------|-----------|
| 336 | [s:1][c:2]([aX2,cH1])!@;-[CX3:3](O)=[O:4]          | 2         |
| 337 | [s:1][c:2]([aX2,cH1])!@;-[CX3:3]=[O:4]             | 1         |
| 338 | [\$([cH0](F)):1][c:2]([cH1])!@;-[CX3:3]([O,N])=... | 2         |
| 339 | [\$([cH0]F):1][c:2]([cH1])!@;-[CX3:3]=[O:4]        | 1         |
| 340 | [\$([cH0](Cl)):1][c:2]([cH1])!@;-[CX3:3]([CX3H]... | 1         |
| 341 | [\$([cH0](Cl)):1][c:2]([cH1])!@;-[CX3H:3]=[O:4]    | 1         |
| 342 | [\$([cH0](Cl)):1][c:2]([cH1])!@;-[CX3:3](O)=[O:4]  | 2         |
| 343 | [nX3H1:1][a:2]!@;-[CX3:3]=[O:4]                    | 2         |
| 344 | [nX2H0:1][c:2]([cH1])!@;-[CX3H1:3]=[O:4]           | 1         |
| 345 | [nX2H0&r6:1][c&r6:2]([c&r6])!@;-[CX3:3](!O)=...    | 1         |
| 346 | [nX2H0:1][a:2]([nX2H0])!@;-[CX3:3]=[O:4]           | 2         |
| 347 | [\$([cH0]!@;-[*^2]):1][c:2]([cH1])!@[CX3:3]=[O:4]  | 2         |
| 348 | [cH0:1][c:2]([cH1])!@;-[CX3:3]=[O:4]               | 2         |
| 349 | [cH0:1][c:2]([cH0])!@;-[CX3:3]=[O:4]               | 1         |
| 350 | [cH1:1][c:2]([cH1])!@;-[CX3:3]([CX3H0])=[O:4]      | 2         |
| 351 | [cH1:1][c:2]([cH1])!@;-[CX3:3]=[O:4]               | 2         |
| 352 | [a:1][a:2]!@;-[CX3:3]=[O:4]                        | 2         |
| 353 | [cH1:1][c:2]([nX2])!@;-[CX3:3]=[NX3:4]             | 2         |
| 354 | [cH1:1][c:2]([nX3H1])!@;-[CX3:3]=[NX2:4]           | 1         |
| 355 | [cH1:1][c:2]([nX2])!@;-[CX3:3]=[NX2:4]             | 2         |
| 356 | [cH1:1][c:2](\$([cH0][OH1]))!@;-[CX3:3]=[NX2:4]    | 1         |
| 357 | [cH1:1][c:2]([cH0])!@;-[CX3x0:3]=[NX2:4]           | 2         |
| 358 | [cH1:1][c:2]([cH1])!@;-[CX3:3]=[NX2:4]             | 2         |
| 359 | [cH0:1][c:2]([cH0])!@;-[CX3!r:3]=[NX2!r:4]         | 2         |
| 360 | [a:1][c:2]!@;-[CX3:3]=[CX3H0:4]                    | 2         |
| 361 | [a:1][a:2]!@;-[CX3:3]=[CX3H2:4]                    | 2         |
| 362 | [a:1][a:2]!@;-[CX3:3]=[CX3H1:4]                    | 2         |
| 363 | [*:1][SX2:2]!@;-[SX2:3][*:4]                       | 2         |
| 364 | sp2-sp2                                            | 2         |
| 365 | sp2-sp3                                            | 3         |
| 366 | sp3-sp3                                            | 3         |
