# Supplementary material for: Bayesian optimization for conformer generation
Source: PubMed Central journal article supplement (PMC6528340; doi:10.1186/s13321-019-0354-7), 2019-05-21
Supplement: 13321_2019_354_MOESM2_ESM.pdf [file 13321_2019_354_MOESM2_ESM.pdf]

---

| Target            | Number of rotatable bonds |
|-------------------|---------------------------|
| astex_1p62        | 2                         |
| astex_1jd0        | 3                         |
| omegacsd_PAPPHI   | 3                         |
| omegacsd_PEXFED   | 3                         |
| omegapdb_1uwc     | 3                         |
| omegapdb_1d3g     | 3                         |
| omegacsd_YINDII   | 3                         |
| omegacsd_GALMOV   | 3                         |
| omegacsd_KAVLIC   | 3                         |
| astex_1n2j        | 3                         |
| omegacsd_WESZOJ   | 3                         |
| omegacsd_DUXYOK   | 3                         |
| omegacsd_YAHBOY   | 3                         |
| omegapdb_2aw1     | 3                         |
| omegacsd_MINTSA   | 3                         |
| omegacsd_CPIPLA   | 3                         |
| astex_1q1g        | 3                         |
| omegacsd_FABWUA10 | 3                         |
| omegapdb_1syh     | 3                         |
| omegacsd_CEVTUS   | 3                         |
| omegacsd_JUDLUP   | 3                         |
| omegacsd_GEKWAU   | 3                         |
| omegapdb_2evc     | 3                         |
| omegapdb_2flb     | 3                         |
| omegacsd_CMSMOC   | 3                         |
| omegacsd_DENBUT   | 4                         |
| omegacsd_PIKDIW   | 4                         |
| omegacsd_SIHVUA   | 4                         |
| omegacsd_WIKJOP   | 4                         |
| omegacsd_MATSTA10 | 4                         |
| omegapdb_1ofd     | 4                         |
| omegapdb_1y6q     | 4                         |
| omegacsd_MTBPNP   | 4                         |
| omegacsd_FOJZUZ   | 4                         |
| omegacsd_GINKUJ   | 4                         |
| omegacsd_YOPRAW   | 4                         |
| omegacsd_BAJZOB10 | 4                         |
| omegapdb_1qy5     | 4                         |
| omegacsd_BUTDID   | 4                         |
| omegacsd_GIHKAJ   | 4                         |
| omegacsd_VUGDEG   | 4                         |
| astex_1tow        | 4                         |

---

Continued on next page

| Target            | Number of rotatable bonds |
|-------------------|---------------------------|
| omegacsd_CAGXEN   | 4                         |
| omegacsd_KEBVES   | 4                         |
| omegacsd_ABHYTZ   | 4                         |
| omegapdb_2g8n     | 4                         |
| omegapdb_1gz8     | 4                         |
| omegacsd_TAPBZO   | 4                         |
| omegapdb_1yc1     | 4                         |
| omegacsd_FOLMEY   | 4                         |
| omegapdb_1uf7     | 4                         |
| omegacsd_CELDEC   | 4                         |
| omegacsd_DENDAC   | 4                         |
| omegacsd_CODYUP10 | 4                         |
| astex_1tz8        | 4                         |
| astex_1opk        | 4                         |
| omegacsd_EHMPYX10 | 4                         |
| omegapdb_1g6c     | 4                         |
| omegacsd_YUKKUK   | 4                         |
| omegacsd_DIGSIV   | 4                         |
| omegapdb_2cbs     | 4                         |
| omegacsd_DAWRAU   | 4                         |
| omegacsd_EITDZL   | 4                         |
| omegacsd_DIZREJ   | 4                         |
| omegapdb_1s8j     | 4                         |
| omegacsd_LETBUH   | 4                         |
| omegacsd_CMPEPI   | 4                         |
| omegapdb_1o3l     | 4                         |
| omegacsd_VOPDIN   | 4                         |
| omegacsd_GEJJUA   | 4                         |
| omegapdb_1rf6     | 4                         |
| omegacsd_LIKMEX   | 5                         |
| omegacsd_DIZWAK   | 5                         |
| omegacsd_YICPIJ   | 5                         |
| omegacsd_DEBBER   | 5                         |
| omegacsd_CETZOQ   | 5                         |
| omegacsd_VEYRAS   | 5                         |
| omegapdb_1v2k     | 5                         |
| omegacsd_NBPENC   | 5                         |
| omegacsd_WAVTIW   | 5                         |
| omegacsd_COKTAX   | 5                         |
| omegacsd_BTHYDX   | 5                         |
| omegacsd_WAMZAL   | 5                         |
| omegacsd_BHMPET   | 5                         |

Continued on next page

| Target            | Number of rotatable bonds |
|-------------------|---------------------------|
| omegacsd_ACPIXZ   | 5                         |
| omegacsd_VURTOR   | 5                         |
| omegapdb_1uf8     | 5                         |
| omegacsd_CBZHXY   | 5                         |
| omegacsd_LACPAG   | 5                         |
| omegacsd_FOLYIO   | 5                         |
| omegacsd_CLPNXA   | 5                         |
| omegacsd_YAHFAO   | 5                         |
| omegacsd_VIBWIM   | 5                         |
| omegapdb_1w9u     | 5                         |
| omegacsd_KICRIX   | 5                         |
| omegacsd_HEXFEV   | 5                         |
| omegacsd_YUYJEH   | 5                         |
| omegacsd_SILTUC   | 6                         |
| omegacsd_TAPSOS   | 6                         |
| omegacsd_DAFVUB   | 6                         |
| omegapdb_1h1s     | 6                         |
| omegacsd_BENPRL   | 6                         |
| omegacsd_SISYIC   | 6                         |
| omegacsd_CMANPQ   | 6                         |
| omegacsd_FLPNTX10 | 6                         |
| omegapdb_2gss     | 6                         |
| omegacsd_PMEPEN   | 6                         |
| astex_1v48        | 6                         |
| omegacsd_FOYLIO   | 6                         |
| omegacsd_SURREC   | 6                         |
| omegapdb_2j34     | 6                         |
| omegacsd_CFBPBI   | 6                         |
| omegacsd_ACENHT   | 6                         |
| omegacsd_FAHXIV   | 6                         |
| omegacsd_PEPHEX   | 6                         |
| omegacsd_FBPAZD   | 6                         |
| astex_1mzc        | 6                         |
| omegacsd_PMBSAN10 | 6                         |
| omegacsd_HALDOL   | 6                         |
| omegacsd_AOPCHY   | 6                         |
| omegacsd_FUJRUX   | 6                         |
| omegacsd_FANRER   | 6                         |
| omegapdb_6prc     | 6                         |
| omegacsd_BEKDIE   | 6                         |
| omegacsd_LEDWAS   | 6                         |
