# Supplementary material for: Bayesian optimization for conformer generation
Source: PubMed Central journal article supplement (PMC6528340; doi:10.1186/s13321-019-0354-7), 2019-05-21

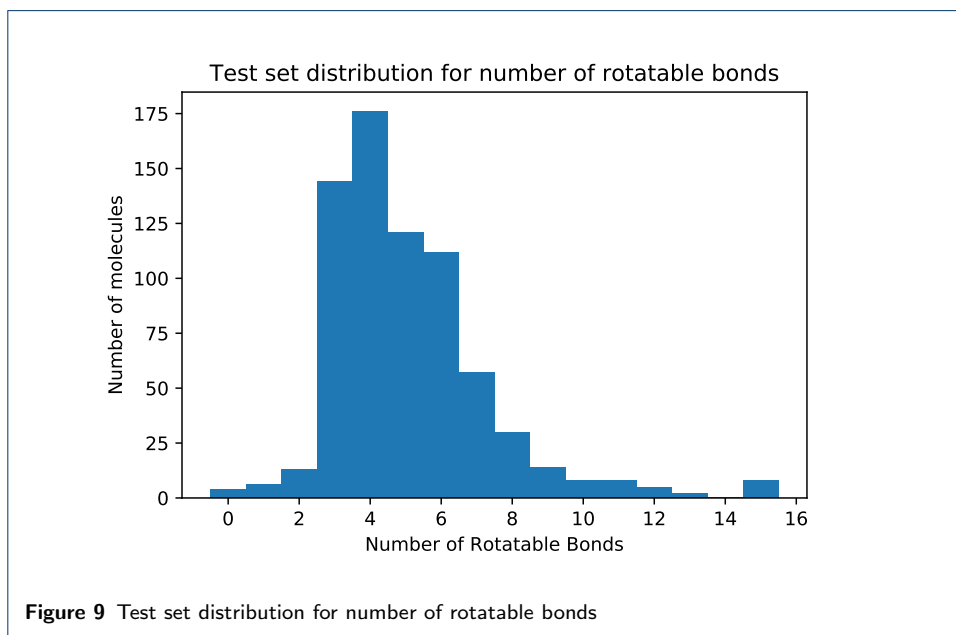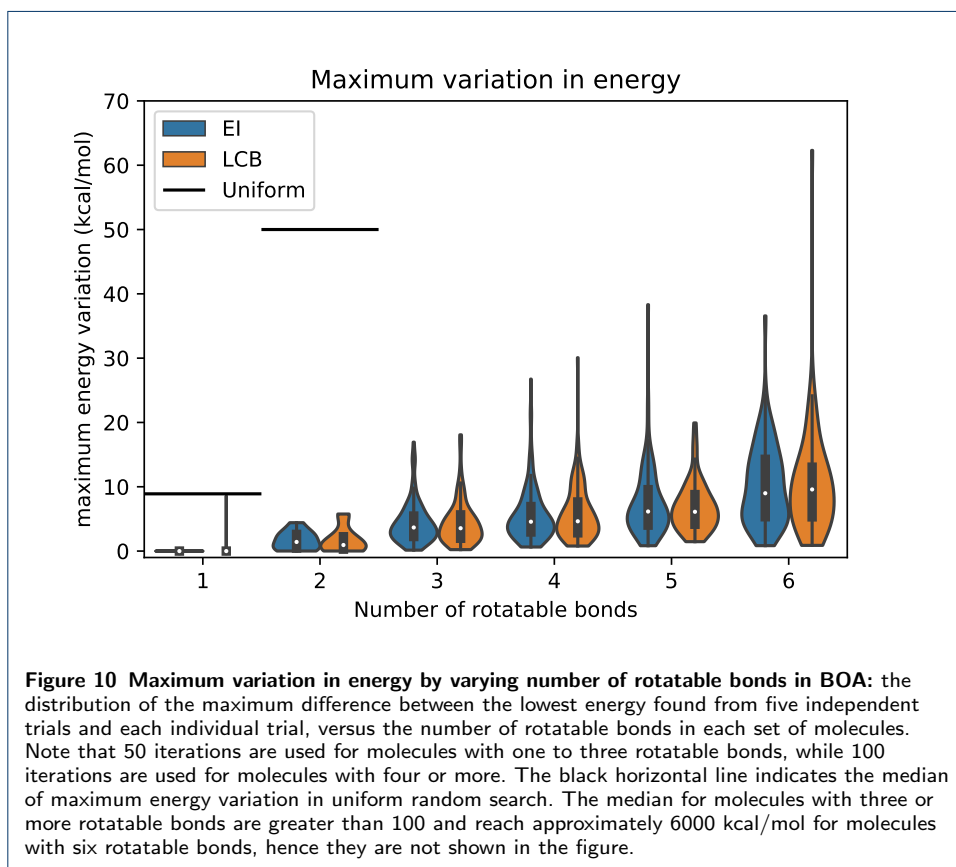

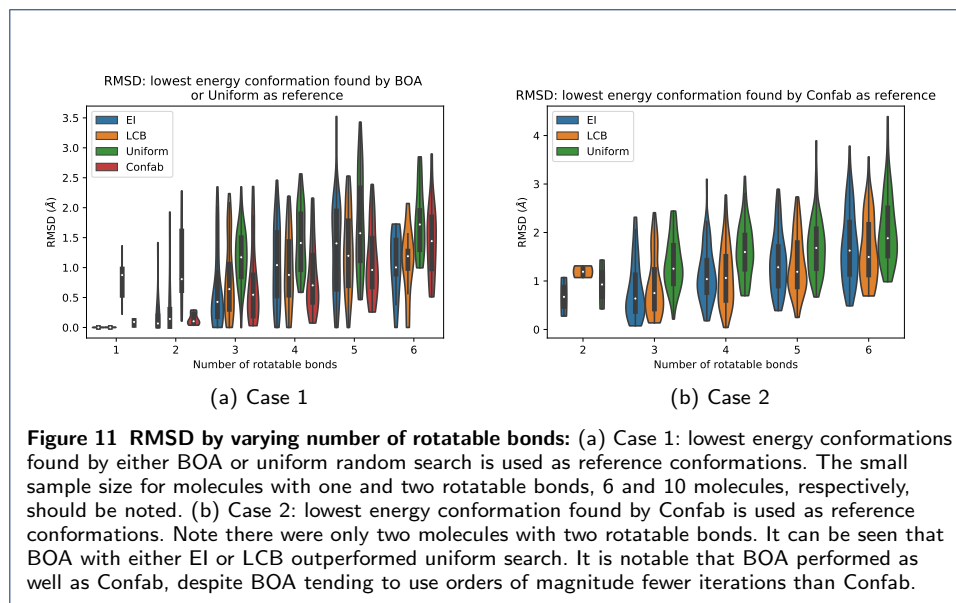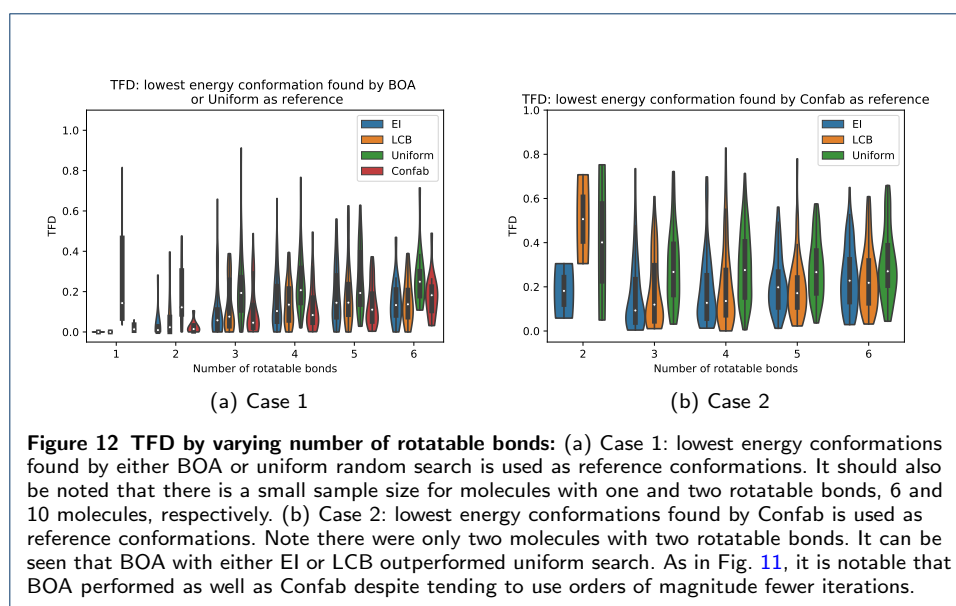

Supplement: 13321_2019_354_MOESM3_ESM.pdf [file 13321_2019_354_MOESM3_ESM.pdf]
