# Supplementary material for: Bayesian optimization for conformer generation
Source: PubMed Central journal article supplement (PMC6528340; doi:10.1186/s13321-019-0354-7), 2019-05-21
Supplement: 13321_2019_354_MOESM4_ESM.pdf [file 13321_2019_354_MOESM4_ESM.pdf]

**Table 4** RMSD: Wilcoxon signed-rank test on each method pair. Case 1: the lowest energy conformations found by either BOA or uniform random search is used as reference conformation. Molecules with three or fewer rotatable bonds ( $N_{rot} : 1, 2, 3$ ) and molecules with five or more rotatable bonds ( $N_{rot} : 5, 6$ ) are grouped together respectively due to small sample size. Case 2: the lowest energy conformation found by Confab is used as reference conformation. Molecules with three or fewer rotatable bonds ( $N_{rot} : 1, 2, 3$ ) are grouped together due to small sample size. The  $p$ -values are rounded to 2 significant figures.

| Method Pairs   | Case | $N_{rot}$             |                      |                      |                      |
|----------------|------|-----------------------|----------------------|----------------------|----------------------|
|                |      | 1,2,3                 | 4                    | 5                    | 6                    |
| El-Uniform     | 1    | $3.7 \times 10^{-10}$ | $6.5 \times 10^{-5}$ | $1.0 \times 10^{-3}$ |                      |
| El-Confab      | 1    | 0.04                  | 0.04                 | 0.32                 |                      |
| El-LCB         | 1    | 0.03                  | 0.67                 | 1.0                  |                      |
| LCB-Confab     | 1    | 0.64                  | 0.24                 | 0.73                 |                      |
| LCB-Uniform    | 1    | $2.6 \times 10^{-7}$  | $6.1 \times 10^{-6}$ | $5.5 \times 10^{-5}$ |                      |
| Confab-Uniform | 1    | $3.1 \times 10^{-9}$  | $8.7 \times 10^{-8}$ | $1.5 \times 10^{-4}$ |                      |
| El-LCB         | 2    | 0.03                  | 0.66                 | 0.96                 | 0.76                 |
| El-Uniform     | 2    | $3.7 \times 10^{-10}$ | $6.5 \times 10^{-5}$ | 0.06                 | $3.1 \times 10^{-3}$ |
| LCB-Uniform    | 2    | $2.6 \times 10^{-7}$  | $6.1 \times 10^{-6}$ | $3.1 \times 10^{-3}$ | $4.8 \times 10^{-3}$ |

**Table 5** TFD: Wilcoxon signed-rank test on each method pair. Case 1: the lowest energy conformations found by either BOA or uniform random search is used as reference conformation. Molecules with three or fewer rotatable bonds ( $N_{rot} : 1, 2, 3$ ) and molecules with five or more rotatable bonds ( $N_{rot} : 5, 6$ ) are grouped together respectively due to small sample size. Case 2: the lowest energy conformation found by Confab is used as reference conformation. Molecules with three or fewer rotatable bonds ( $N_{rot} : 1, 2, 3$ ) are grouped together due to small sample size. The  $p$ -values are rounded to 2 significant figures.

| Method Pairs   | Case | $N_{rot}$             |                      |                      |      |
|----------------|------|-----------------------|----------------------|----------------------|------|
|                |      | 1,2,3                 | 4                    | 5                    | 6    |
| El-Uniform     | 1    | $1.3 \times 10^{-8}$  | $2.1 \times 10^{-5}$ | $3.1 \times 10^{-4}$ |      |
| El-Confab      | 1    | 0.70                  | 0.14                 | 0.14                 |      |
| El-LCB         | 1    | 0.07                  | 0.94                 | 0.74                 |      |
| LCB-Confab     | 1    | 0.14                  | 0.16                 | 0.26                 |      |
| LCB-Uniform    | 1    | $1.0 \times 10^{-6}$  | $2.1 \times 10^{-5}$ | $4.9 \times 10^{-4}$ |      |
| Confab-Uniform | 1    | $9.9 \times 10^{-10}$ | $5.0 \times 10^{-6}$ | $9.0 \times 10^{-6}$ |      |
| El-LCB         | 2    | 0.07                  | 0.94                 | 0.61                 | 0.91 |
| El-Uniform     | 2    | $1.3 \times 10^{-8}$  | $2.1 \times 10^{-5}$ | 0.01                 | 0.01 |
| LCB-Uniform    | 2    | $1.0 \times 10^{-6}$  | $2.1 \times 10^{-5}$ | $5.1 \times 10^{-3}$ | 0.04 |
